# Supplementary material
Source: publisher figshare collection journal article supplement (https://springernature.figshare.com/ndownloader/files/16379609)

**Additional file**

**Fig. S1.** DNA sequence alignment and base mutation frequency detection of xylanase mutant library


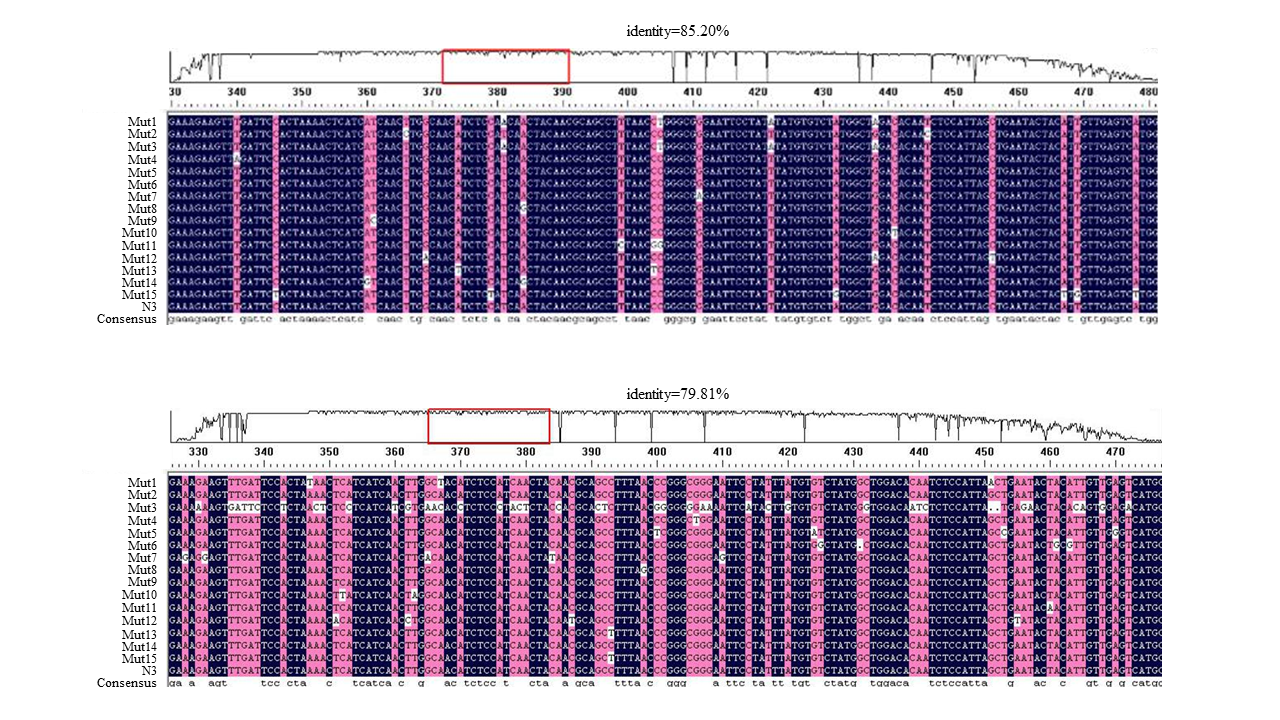

Supplement: Supplementary file 1 [file 16379609]
